# Supplementary material
Source: publisher figshare collection journal article supplement (https://frontiersin.figshare.com/ndownloader/files/12282323)
Supplement: Supplementary file 1 [file 12282323]

## Sheet: Sheet1
Volcano	Event Start	Event_start_dateest	Notification Class	VEI	Composition	Repose Time (years)	Seismic Monitoring	Detect Only, notification lag (days)	Detect Only, notification lag, Seis Yes (days)	Notice Date	Forecast Lead time (days)	First color code change, monitored volcanoes only	Event Description	Main Citation
Akutan	1989-02-27	1989-02-27	Missed	2	BA	0.9	NO						Intermittent small steam and/or ash plumes for about a month; posible ash received at Akutan Village on March 16, 1989.	Reeder, J.W., 1992, Akutan: in Annual report of the world volcanic eruptions in 1989, Bulletin of Volcanic Eruptions, v. 29, p. 71-72.
Akutan	1990-01-22	1990-01-22	Missed	2	BA	0.9	NO						Small, short-lived ash plumes from Akutan during late January, 1990.	Reeder, J.W., 1993, Akutan: in Annual report of the world volcanic eruptions in 1990, Bulletin of Volcanic Eruptions, v. 30, p. 61-62.
Akutan	1990-09-06	1990-09-06	Missed	2	BA	0.6	NO						Small, short-lived ash plumes from Akutan during September, 1990.	Reeder, J.W., 1993, Akutan: in Annual report of the world volcanic eruptions in 1990, Bulletin of Volcanic Eruptions, v. 30, p. 61-62.
Akutan	1991-09-15	1991-09-15	Detect Only	2	BA	1	NO	12		1991-09-27			Intermittent small ash plumes from Akutan, for about 6 weeks; the largest reached about 4,500 m above sea level. Trace ash fell on Akutan Village on October 13, 1991.	Reeder, J.W., 1994, Akutan: in Annual report of the world volcanic eruptions in 1991, Bulletin of Volcanic Eruptions, v. 31, p. 81-83.
Akutan	1992-03-08	1992-03-08	Detect Only	2	BA	0.5	NO	0.875		1992-03-08			Small steam and ash plumes observed from Aktuan, between March and May, 1992; the largest reached about 2,500 m above sea level.	McGimsey, R.G., Neal, C.A., and Doukas, M.P., 1995, Volcanic activity in Alaska: Summary of events and response of the Alaska Volcano Observatory 1992: U.S. Geological Survey Open-File Report 95-83, 26 p.
Akutan	1992-12-18	1992-12-18	Missed	1	BA	0.8	NO						A pilot observed a small ash cloud rising several hundred meters above the summit.	McGimsey, R.G., Neal, C.A., and Doukas, M.P., 1995, Volcanic activity in Alaska: Summary of events and response of the Alaska Volcano Observatory 1992: U.S. Geological Survey Open-File Report 95-83, 26 p.
Akutan	1996-03-10	1996-03-10	UwE		BA	3.2	NO			1996-03-11			Two seismic swarms, beginning on March 10 and March 13, 1996. The largest individual shock was a M5.3. Earthquakes in the swarm caused minor damage to households in Akutan Village, and many residents chose to self-evacuate. The swarms are interpreted as the result of a magmatic intrusion that failed to erupt.	Neal, Christina, and McGimsey, R.G., 1997, 1996 volcanic activity in Alaska and Kamchatka: Summary of events and response of the Alaska Volcano Observatory: U.S. Geological Survey Open-File Report 97-0433, 34 p.
Amukta	1996-07-17	1996-07-15	Detect Only	1		8.8	NO	2		1996-07-19			The U.S. Coast Guard observed a "large plume of ash and smoke" from Amutka in early July, 1996. Pilots also observed steam and ash plumes on July 17, 18, and September 18, 1996.	Neal, Christina, and McGimsey, R.G., 1997, 1996 volcanic activity in Alaska and Kamchatka: Summary of events and response of the Alaska Volcano Observatory: U.S. Geological Survey Open-File Report 97-0433, 34 p.
Amukta	1997-03-02	1997-03-02	Uncertain			0.7	NO			1997-03-07			A pilot reported a small ash eruption at Amutka on March 2, 1997.	McGimsey, R.G., and Wallace, K. L., 1999, 1997 volcanic activity in Alaska and Kamchatka: Summary of events and response of the Alaska Volcano Observatory: U.S. Geological Survey Open-File Report 99-0448, 42 p.
Kliuchef	1993-12-04	1993-12-04	UwE		BA	181	NO			1993-12-10			Residents of Akta reported "rumbling" and observed increased steaming from the fumarolic area on the flank of Kliuchef.	Smithsonian Institution, 1993, Atka: Global Volcanism Network Bulletin v. 18, n. 11, unpaged.
Kliuchef	1995-05-01	1995-05-01	Uncertain		BA	183	NO			1995-05-05			Residents of Akta reported a strong sulfur smell and a small, plume-like cloud over Kliuchef. Later that week, satellite images showed a hot spot on Korovin, possibly corresponding to a known fumarolic area.	McGimsey, R.G., and Neal, Christina, 1996, 1995 volcanic activity in Alaska and Kamchatka: summary of events and response of the Alaska Volcano Observatory: U.S. Geological Survey Open-File Report 96-0738, 22 p.
Augustine	2005-12-02	2005-12-02	Good	3	A	19.7	YES			2005-11-29	3	G to Y	AVO noted precursory seismicity at Augustine as early as May, 2005. The first phreatic explosion occurred on December 2, 2006. The main explosive phase lasted from January 11 - 28, 2006, followed by a continous phase from January 28- February 2, 2006. Augustine then entered an effusive, dome-building phase that lasted until late March. This eruption disrupted air traffic in January 2006, and resu…	Power, J.A., Coombs, M.L., and Freymueller, J.T., eds., 2010, The 2006 eruption of Augustine Volcano, Alaska: U.S. Geological Survey Professional Paper 1769, 667 p., 1 plate, scale 1:20,000, and data files. Available online at http://pubs.usgs.gov/pp/1769/ .
Augustine	2007-07-16		UwE		A	1.5	YES			2007-09-22		G to Y	Increases in seismicity and observations of steam plumes prompted AVO to raise the Aviation Color Code and Volcano Alert to YELLOW/ADVISORY on September 22, 2007. After seismicity decline, it was lowered to GREEN/NORMAL on October 12, 2007.	McGimsey, R.G., Neal, C.A., Dixon, J.P., Malik, Nataliya, and Chibisova, Marina, 2011, 2007 Volcanic activity in Alaska, Kamchatka, and the Kurile Islands: Summary of events and response of the Alaska Volcano Observatory: U.S. Geological Survey Scientific Investigations Report 2010-5242, 110 p. Available online at http://pubs.usgs.gov/sir/2010/5242/ .
Bogoslof	1992-07-06	1992-07-06	Detect Only	3	BA	66	NO	7		1992-07-14			Three-week eruptive period consisting of tephra plumes to about 8,000 m above sea level, and construction of a 150 x 275 x 150 m subaerial lava dome.	McGimsey, R.G., Neal, C.A., and Doukas, M.P., 1995, Volcanic activity in Alaska: Summary of events and response of the Alaska Volcano Observatory 1992: U.S. Geological Survey Open-File Report 95-83, 26 p.
Bogoslof	2016-12-11	2016-12-11	Detect Only	3	BA	24.4	NO	9		2016-12-20			More than 60 ash and steam plumes, reaching as high as 10,300 m above sea level, and construction and destruction of at least two lava domes. This activity began in mid-December, 2016, and continued until at least August, 2017. This eruption also disrupted air traffic, particularly during December 2016 and January 2017, and deposited trace amounts of ashfall on Dutch Harbor/Unalaska. At the time …	https://www.avo.alaska.edu/volcanoes/activity.php?volcname=Bogoslof&page=basic&eruptionid=1301
Chiginagak	1997-10-22		UwE		A	3100	NO			1997-10-31			Pilot reports of fumarolic and snowmelt activity at Chiginagak; thermal anomalies detected in satellite imagery.	McGimsey, R.G., and Wallace, K.L., 1999, 1997 volcanic activity in Alaska and Kamchatka: Summary of events and response of the Alaska Volcano Observatory: U.S. Geological Survey Open-File Report 99-0448, 42 p.
Chiginagak	00-00-2005		UwE		A	3100	NO			2005-08-23			Increased heat to the summit area of Chiginagak sometime between November 2004 and May 2005 resulted in melting the summit cauldron lake. This lake released in early May 2005, resulting in debris, acidic water, and aerosols travelling downstream, killing vegetation and fish.	Schaefer, J.R., Scott, W.E., Evans, W.C., Wang, Bronwen, and McGimsey, R.G., 2013, Summit crater lake observations, and the location, chemistry, and pH of water samples near Mount Chiginagak volcano, Alaska: 2004-2012: Alaska Division of Geological & Geophysical Surveys Report of Investigation 2011-6 v. 2, 25 p., available online at www.dggs.gov/pubs/id/25602 .
Cleveland	1989-10-22	1989-10-22	Missed		A	2.3	NO						Mariners observed nighttime incandescence for about a week.	Reeder, J.W., 1992, Cleveland: in Annual Report of the World Volcanic Eruptions in 1989, Bulletin of Volcanic Eruptions, v. 29, p. 70-71.
Cleveland	1994-05-25	1994-05-25	Detect Only	3	A	4.6	NO	0.5		1994-05-25			Pilots reported a substantial steam plume, possibly containing ash, on April 29, 1994, and May 25, 1994. Mariners later observed fresh ash on the volcano's north and east flanks.	Neal, C.A., Doukas, M.P., and McGimsey, R.G., 1995, 1994 volcanic activity in Alaska: summary of events and response of the Alaska Volcano Observatory: U.S. Geological Survey Open-File Report 95-0271, 18 p.
Cleveland	1997-05-05	1997-05-05	Missed	2	A	2.9	NO						The U.S. Coast Guard observed and filmed a steam-and-ash eruption at Cleveland. The plume extended for about 50 km downwind.	McGimsey, R.G., and Wallace, K.L., 1999, 1997 volcanic activity in Alaska and Kamchatka: Summary of events and response of the Alaska Volcano Observatory: U.S. Geological Survey Open-File Report 99-0448, 42 p.
Cleveland	2001-02-02	2001-02-02	Detect Only	3	A	3.8	NO	17		2001-02-19			Mt. Cleveland erupted explosively on February 19, March 11, and March 19, 2001. The highest plume reached 12,000 m above sea level, and the February ash cloud impacted North Pacfic air traffic.	McGimsey, R.G., Neal, C.A., and Girina, Olga, 2004: 2001 volcanic activity in Alaska and Kamchatka: Summary of events and response of the Alaska Volcano Observatory: U.S. Geological Survey Open-File Report 2004-1453, 53 p.
Cleveland	2005-04-27	2005-04-27	Detect Only	2	A	4.4	NO	64		2005-07-01			Small, intermittent steam and ash plumes from April, 2005 through September, 2005. The highest plume reached about 4,600 m above sea level.	McGimsey, R.G., Neal, C.A., Dixon, J.P., and Ushakov, Sergey, 2008, 2005 Volcanic activity in Alaska, Kamchatka, and the Kurile Islands: Summary of events and response of the Alaska Volcano Observatory: U.S. Geological Survey Scientific Investigations Report 2007-5269, 94 p., available at http://pubs.usgs.gov/sir/2007/5269/ .	missed probable ash in April. Went to yellow two days after definite ash.
Fourpeaked	2006-09-17	2006-09-17	Detect Only	2	A	11000	NO	1		2006-09-18			Residents of Alaska's Kenai Peninsula reported a volcanic plume rising from the area near Cape Douglas, in lower Cook Inlet. The source was Fourpeaked, a little-studied, ice-covered volcano not thought to be active within the Holocene. The plume was phreatic, rose about 6,100 m above sea level, and lasted about 10 hours.	Neal, C.A., McGimsey, R.G., Dixon, J.P., Manevich, Alexander, and Rybin, Alexander, 2009, 2006 Volcanic activity in Alaska, Kamchatka, and the Kurile Islands: Summary of events and response of the Alaska Volcano Observatory: U.S. Geological Survey Scientific Investigations Report 2008-5214, 102 p., available at http://pubs.usgs.gov/sir/2008/5214/ .
Gareloi	1989-08-17	1989-08-17	Missed	1	BA	1.9	NO						A pilot reported a grayish to black tephra plume on August 17, 1989.	Reeder, J.W., 1992, Gareloi: in (eds.), Annual report of the world volcanic eruptions in 1989, Bulletin of Volcanic Eruptions, v. 29, p. 70.
Gareloi	1996-09-27	1996-09-27	Uncertain		BA	7.1	NO						A pilot reported a small eruption of ash and steam at Gareloi, rising to about 1,500 m above sea level.	Smithsonian Institution, 1996, Gareloi: Global Volcanism Network Bulletin v. 21, n. 10, unpaged.
Great Sitkin	2017-06-30		UwE		A	43.4	YES			2017-11-22		G to Y	Increasing seismicity and larger-than-typical steam plumes observed at Great Sitkin. In the Volcano Activity Notice, AVO stated the activity was likely due to magma intrusion.	https://www.avo.alaska.edu/activity/report.php?type=3&id=362151&mode=hans
Iliamna	1996-05-10		UwE		A	4000	YES			1996-08-16		G to G; extensive information statements	Two seismic swarms occurred in 1996 at Iliamna; one from May 10 - May 28, and another from the end of June - September. Gas emissions also increased. This activity (Roman, 2004) may be the result of the intrusion of new magma.	Roman, D.C., Power, J.A., Moran, S.C., Cashman, K.V., Doukas, M.P., Neal, C.A., and Gerlach, T.M., 2004, Evidence for dike emplacement beneath Iliamna Volcano, Alaska in 1996: Journal of Volcanology and Geothermal Research, v. 130, n. 3-4, p. 265-284.
Iliamna	2011-12-22	2011-12-22	UwE		A	4000	YES			2012-03-07		G to Y on 9 March 2012	Elevated seismicity, fumarolic activity, and gas emissions, possibly indicative of a new magma intrusion to shallow levels, occurred from December 2011 throughout 2012. Iliamna also experienced slow-creep events (early 2012) and avalanches (October, 2012).	Prejean, S.G., Werner, C.A., Buurman, H., Doukas, M.P., Kelly, P.J., Kern, C., Ketner, D.M., Stihler, S.D., Thurber, C.H., and West, M.E., 2012, Seismic and gas analyses imply magmatic intrusion at Iliamna Volcano, Alaska in 2012 [abs.]: Eos Trans., American Geophysical Union, Fall meeting supplement, Abstract number V53B-2826.
Kanaga	1994-01-13	1994-01-13	Detect Only	2	BA	51.6	NO	1		1994-01-14			Intermittent steam and ash plumes, rising to as high as 7.5 km above sea level, formation of a lava flow within the summit crater, and minor avalanches of indcandescent material down the north flank, from January 1994 through 1995.	McGimsey, R.G., and Neal, Christina, 1996, 1995 volcanic activity in Alaska and Kamchatka: summary of events and response of the Alaska Volcano Observatory: U.S. Geological Survey Open-File Report 96-0738, 22 p.
Kanaga	1996-06-11	1996-06-11	Uncertain		BA	2.4	NO						A flight crew observed a small cloud containing possible ash, and smelled sulfur on their descent to Adak.	Neal, Christina, and McGimsey, R.G., 1997, 1996 volcanic activity in Alaska and Kamchatka: Summary of events and response of the Alaska Volcano Observatory: U.S. Geological Survey Open-File Report 97-0433, 34 p.
Kanaga	2012-02-18	2012-02-18	Detect Only	2	BA	18.1	YES	0.375	0.375	2012-02-18		G to Y	AVO detected seismic tremor at Kanaga on February 18, 2012, followed by smaller events and a possible airwave signal. Ten minutes after tremor onset, satellite images showed a possible small ash cloud from Kanaga, at about 6 km above sea level. Photographs of Kanaga taken after the explosion showed steaming from the crater, and tephra or flowage on the volcano's flanks. A March 5 satellite radar …	Herrick, J.A., Neal, C.A., Cameron, C.E., Dixon, J.P., and McGimsey, R.G., 2014, 2012 Volcanic activity in Alaska: Summary of events and response of the Alaska Volcano Observatory: U.S. Geological Survey Scientific Investigations Report 2014-5160, 82p., http://dx.doi.org/10.3133/sir20145160.
Kasatochi	2008-08-07	2008-08-07	Good	4	A	4000	NO			2007-08-06	0.75		Kasatochi's precursory earthquake activity was strong enough to be picked up on the Alaska Earthquake Center's regional network about one month prior to the eruption, and felt by U.S. Fish and Wildlife Service personnel doing fieldwork on Kasatochi for less than a week before the eruption. Kasatochi erupted on August 7, with tephra plumes that reached 15,240 m above sea level, disrupted North Pac…	Nye, C.J., Scott, W.E., Neill, O.K., Waythomas, C.F., Cameron, C.E., and Calvert, A.T., 2017, Geology of Kasatochi volcano, Aleutian Islands, Alaska: Alaska Division of Geological & Geophysical Surveys Professional Report 123, 127 p., 1 sheet, scale 1:5000. http://doi.org/10.14509/29718
Kiska	1990-06-01	1990-06-01	Missed	2	A	20.7	NO						Steam and minor ash was observed at Kiska on June 1, 1990.	Miller, T.P., McGimsey, R.G., Richter, D.H., Riehle, J.R., Nye, C.J., Yount, M.E., and Dumoulin, J.A., 1998, Catalog of the historically active volcanoes of Alaska: U.S. Geological Survey Open-File Report 98-0582, 104 p.
Korovin	1998-06-30	1998-06-30	Detect Only	3	BA	11.3	NO	0.5		1998-06-30			A small, short-lived ash cloud was observed from Korovin on June 30, 1998.	McGimsey, R.G., Neal, C.A., and Girina, Olga, 2003, 1998 volcanic activity in Alaska and Kamchatka: Summary of events and response of the Alaska Volcano Observatory: U.S. Geological Survey Open-File Report 03-0423, 35 p.
Korovin	00-Jul-2002		Uncertain		BA	3.9	NO						An astronaut image of Korovin from July 5, 2002 shows ash deposits on the upper east flank of Korovin. This deposit was likely the result of a small, phreatic eruption at Korovin some time prior to the satellite image being taken.	McGimsey, R.G., Neal, C.A., Dixon, J.P., and Ushakov, Sergey, 2008, 2005 Volcanic activity in Alaska, Kamchatka, and the Kurile Islands: Summary of events and response of the Alaska Volcano Observatory: U.S. Geological Survey Scientific Investigations Report 2007-5269, 94 p., available at http://pubs.usgs.gov/sir/2007/5269/ .
Korovin	00-Jun-04	2004-06-15	Uncertain		BA	6	NO						Satellite imagery and field observations of ash on the upper east flank of Korovin volcano in late June - early July, 2004 likely result from a small phreatic eruption of Korovin prior to late June.	McGimsey, R.G., Neal, C.A., Dixon, J.P., and Ushakov, Sergey, 2008, 2005 Volcanic activity in Alaska, Kamchatka, and the Kurile Islands: Summary of events and response of the Alaska Volcano Observatory: U.S. Geological Survey Scientific Investigations Report 2007-5269, 94 p., available at http://pubs.usgs.gov/sir/2007/5269/ .
Korovin	2005-02-23	2005-02-23	Uncertain		BA	6.7	YES - unofficial			2005-02-24		G to Y	Residents of Akta reported seeing a steam-and-ash eruption of Korovin on February 23, 2006. Intermittent steam plume continued, possibly containing ash, through February and March.	McGimsey, R.G., Neal, C.A., Dixon, J.P., and Ushakov, Sergey, 2008, 2005 Volcanic activity in Alaska, Kamchatka, and the Kurile Islands: Summary of events and response of the Alaska Volcano Observatory: U.S. Geological Survey Scientific Investigations Report 2007-5269, 94 p., available at http://pubs.usgs.gov/sir/2007/5269/ .
Korovin	2006-01-16	2006-01-16	UwE		BA	7.6	YES			2006-02-22		G to Y	Increased seismic and fumarolic activity prompted AVO to raise the Aviation Color Code and Volcano Alert Level to YELLOW/ADVISORY. InSAR images comparing July and October 2006 indicated as much as 5 cm of uplift, possibly due to a pressurizing and inflating hydrothermal system, or a rising magmatic intrusion. Atka observers continued to report white steam plumes, although one observer also report…	McGimsey, R.G., Neal, C.A., Dixon, J.P., Malik, Nataliya, and Chibisova, Marina, 2011, 2007 Volcanic activity in Alaska, Kamchatka, and the Kurile Islands: Summary of events and response of the Alaska Volcano Observatory: U.S. Geological Survey Scientific Investigations Report 2010-5242, 110 p. Available online at http://pubs.usgs.gov/sir/2010/5242/ .
Little Sitkin	2012-08-22	2012-08-22	UwE		A	??	YES - unofficial			2012-08-30		U to Y	AVO observed an earthquake swarm at Little Sitkin, beginning August 22, 2012, and tapering off in November, 2012. Subsequent InSAR images showed inflation beneath the modern Little Sitkin cone, suggesting a magmatic intrusion.	Herrick, J.A., Neal, C.A., Cameron, C.E., Dixon, J.P., and McGimsey, R.G., 2014, 2012 Volcanic activity in Alaska: Summary of events and response of the Alaska Volcano Observatory: U.S. Geological Survey Scientific Investigations Report 2014-5160, 82p., http://dx.doi.org/10.3133/sir20145160.
Makushin	1993-09-14	1993-09-14	Missed	1	A	13.3	NO						From September, 1993, to November 1993, pilots reported smelling sulfur northwest of Dutch Harbor, and observers intermittently saw snow apparently darkened by ash.	Neal, C.A., McGimsey, R.G., and Doukas, M.P., 1996, 1993 volcanic activity in Alaska: summary of events and response of the Alaska Volcano Observatory: U.S. Geological Survey Open-File Report 96-0024, 21 p.
Makushin	1995-01-30	1995-01-30	Detect Only	1	A	14.7	NO	4		1995-02-03			Pilots reported a small steam and ash plume from Makushin on January 30, 1995.	McGimsey, R.G., and Neal, Christina, 1996, 1995 volcanic activity in Alaska and Kamchatka: summary of events and response of the Alaska Volcano Observatory: U.S. Geological Survey Open-File Report 96-0738, 22 p.
Martin	2006-01-08	2006-01-08	UwE		A	2060	YES			2006-01-10		G to Y	AVO raised the Level of Concern color code from GREEN to YELLOW on January 10, 2006, following a sharp increase in earthquake activity at Martin, beginning on January 8. The elevated seismicity continued for about two weeks.	Neal, C.A., McGimsey, R.G., Dixon, J.P., Manevich, Alexander, and Rybin, Alexander, 2009, 2006 Volcanic activity in Alaska, Kamchatka, and the Kurile Islands: Summary of events and response of the Alaska Volcano Observatory: U.S. Geological Survey Scientific Investigations Report 2008-5214, 102 p., available at http://pubs.usgs.gov/sir/2008/5214/ .
Okmok	1997-02-11	1997-02-11	Detect Only	3	B	10.2	NO	2		1997-02-13			This eruption began on or shortly before February 11, 1997, when a pilot and passengers observed a tephra plume. This observation was not immediately reported to AVO; AVO's first awareness of the eruption was detection of a thermal anomaly in satellite imagery on February 13, 1997. Intermittent ash plumes rose as high as 9 km above sea level, and the eruption also produced a 8.8 square km lava fl…	Patrick, M.R., Dehn, J., Papp, K.R., Lu, Z., Dean, K., Moxey, L., Izbekov, P., and Guritz, R., 2003, The 1997 eruption of Okmok Volcano, Alaska: a synthesis of remotely sensed imagery: Journal of Volcanology and Geothermal Research, v. 127, n. 1-2, p. 87-105.
Okmok	2001-05-11		UwE		BA	4.2	NO			2001-05-11			Earthquakes under Okmok volcano were detected on the Makushin seismic network, prompting AVO to issue an update about the seismicity on May 11, 2001. SAR interferometry showed the center of the caldera inflating about 20 cm since the end of the 1997 eruption and September, 2000.	McGimsey, R.G., Neal, C.A., and Girina, Olga, 2004: 2001 volcanic activity in Alaska and Kamchatka: Summary of events and response of the Alaska Volcano Observatory: U.S. Geological Survey Open-File Report 2004-1453, 53 p.
Okmok	2008-07-12	2008-07-12	Detect Only	4	BA	11.4	YES	0.125	0.125	2008-07-12		G to R	Retrospecive analysis showed that the 2008 eruption of Okmok had a few hours of subtle, precursory seismicity. The eruption began with an explosive, protracted eruption on July 12, 2008. This plume reached up to 16 km above sea level. The eruption continued for five weeks, covering the northeast end of Umnak Island in tephra and lahar deposits, and created significant geomorphic changes within th…	Neal, C.A., McGimsey, R.G., Dixon, J.P., Cameron, C.E., Nuzhaev, A.A., and Chibisova, Marina, 2011, 2008 Volcanic activity in Alaska, Kamchatka, and the Kurile Islands: Summary of events and response of the Alaska Volcano Observatory: U.S. Geological Survey Scientific Investigations Report 2010-5243, 94 p., available at http://pubs.usgs.gov/sir/2010/5243 .
Okmok	2009-03-02	2009-03-02	UwE		BA	0.6	YES			2009-03-02		G to Y	In response to strong, tremor-like seismic signals, and a small thermal anomaly, AVO raised the Aviation Color Code and Level of Concern to YELLOW/ADVISORY on March 2, 2009. Seismicity returned to background levels, and AVO lowered the volcano to GREEN/NORMAL on March 20. Another series of tremor bursts occurred on May 24-25, 2009, and then activity again returned to background levels. During 200…	McGimsey, R.G., Neal, C.A., Girina, O.A., Chibisova, Marina, and Rybin, Alexander, 2014, 2009 Volcanic activity in Alaska, Kamchatka, and the Kurile Islands - summary of events and response of the Alaska Volcano Observatory: U.S. Geological Survey Scientific Investigations Report 2013-5213, 125 p., http://pubs.usgs.gov/sir/2013/5213/ .
Pavlof	1990-01-05	1990-01-05	Missed	2	BA	3.7	NO						An FAA observer in Cold Bay reported steam, and a darkening of the volcano's summit. Several eruption plumes were observed on March 5, 1990.	Reeder, J.W., McNutt, S.R., and Abers, G.A., 1993, Pavlof: in Annual report of the world volcanic eruptions in 1990, Bulletin of Volcanic Eruptions, v. 30, p. 64-65.
Pavlof	1996-09-11	1996-09-11	Detect Only	2	BA	6.7	YES - unofficial	5	5	1996-09-16		U to O	Pavlof began erupting on September 11, 1996. Steam and ash clouds rose to 9 km above sea level, and lava fountaining was observed from Cold Bay. Activity continued until January, 1997, although it became more intermittent in December, 1996. Trace ashfall was reported in King Cove on the night of October 5-6, Sand Point on October 19, and Nelson Lagoon on October 28.	Neal, Christina, and McGimsey, R.G., 1997, 1996 volcanic activity in Alaska and Kamchatka: Summary of events and response of the Alaska Volcano Observatory: U.S. Geological Survey Open-File Report 97-0433, 34 p.
Pavlof	1997-06-01		Uncertain		BA	0.7	YES			1997-06-02		G to Y	AVO elevated the Level of Concern color code to YELLOW on June 1, 1997, after an increase in seismicity and observer reports of steam plumes. Elevated seismicity and thermal anomalies continued for about a week.	McGimsey, R.G., and Wallace, K.L., 1999, 1997 volcanic activity in Alaska and Kamchatka: Summary of events and response of the Alaska Volcano Observatory: U.S. Geological Survey Open-File Report 99-0448, 42 p.
Pavlof	2007-08-14	2007-08-14	Detect Only	2	BA	10.9	YES	0.125	0.125	2007-08-14		G to Y	The 2007 Strombolian eruption lasted about one month, and produced a spatter-fed lava flow, ash clouds that rose to 5,500 m above sea level, and lahars.	McGimsey, R.G., Neal, C.A., Dixon, J.P., Malik, Nataliya, and Chibisova, Marina, 2011, 2007 Volcanic activity in Alaska, Kamchatka, and the Kurile Islands: Summary of events and response of the Alaska Volcano Observatory: U.S. Geological Survey Scientific Investigations Report 2010-5242, 110 p. Available online at http://pubs.usgs.gov/sir/2010/5242/ .
Pavlof	2013-05-13	2013-05-13	Detect Only	3	BA	5.7	YES	0.25	0.25	2013-05-13		G to O	On May 13, 2013, Pavlof began erupting. This eruption lasted about three weeks, and created tephra plumes reaching 8,500 m above sea level, a lava flow, and lahars. Ash plumes from this eruption disrupted regional air traffic, and produced trace amounts of ashfall on Sand Point, Nelson Lagoon, Cold Bay, and King Cove.	Waythomas, C.F., Haney, M.M., Fee, David, Schneider, D.J., and Wech, Aaron, 2014: The 2013 eruption of Pavlof Volcano, Alaska: a spatter eruption at an ice- and snow-clad volcano: Bulletin of Volcanology, v. 76, n. 862, 12 p., doi: 10.1007/s00445-014-0862-2
Pavlof	2014-05-30	2014-05-30	Detect Only	3	BA	1	YES	0.125	0.125	2014-05-31		G to O	Pavlof began another eruption on May 30, 2014. This eruptive period lasted about 1 month, and generated ash clouds to 6,700 m above sea level, and lava flows. Trace amounts of fine ash fell on Sand Point. This eruption disrupted regional air traffic.	Waythomas, C.F., Haney, M.M., Wallace, K.L., Cameron, C.E., and Schneider, D.J., 2017, The 2014 eruptions of Pavlof Volcano, Alaska: U.S. Geological Survey Scientific Investigations Report 2017-5129, 27 p., https://doi.org/10.3133/sir20175129.
Pavlof	2014-11-12	2014-11-12	Detect Only	1	BA	0.5	YES	0.375	0.375	2014-11-12		G to O	On November 12, 2014, Pavlof began another eruption. This one lasted until November 17, 2014, and produced ash clouds to 11 km above sea level, and a lava flow.	Waythomas, C.F., Haney, M.M., Wallace, K.L., Cameron, C.E., and Schneider, D.J., 2017, The 2014 eruptions of Pavlof Volcano, Alaska: U.S. Geological Survey Scientific Investigations Report 2017-5129, 27 p., https://doi.org/10.3133/sir20175129.
Pavlof	2016-03-27	2016-03-27	Detect Only	2	BA	1.8	YES	0.125	0.125	2016-03-27		G to R	Another eruption of Pavlof occurred between March 27, 2016, and July 28. The highest ash plume heights reached 10.6 km above sea level, and the eruption also generated lahars. Minor ashfall occurred at Nelson Lagoon. Trace ashfall was reported at Port Heiden, Dillingham, and Togiak. More than 100 airline flights were cancelled, including many between Anchorage and the northern parts of Alaska.	https://www.avo.alaska.edu/volcanoes/activity.php?volcname=Pavlof&page=basic&eruptionid=1151
Pavlof	2017-06-07	2017-06-07	UwE		BA	1.2	YES			2017-06-07		G to Y	Following an increase in low-frequency seismicity and a pilot report of possible ash, AVO raised the Aviation Color Code and Level of Concern at Pavlof to YELLOW/ADVISORY on June 7, 2017. Weakly elevated surface temperatures and degassing plumes continued to be observed, but no eruption resulted. AVO lowered Pavlof to GREEN/NORMAL on August 30, 2017.	https://www.avo.alaska.edu/volcanoes/activity.php?volcname=Pavlof&page=basic&eruptionid=4121
Redoubt	1989-12-14	1989-12-14	Good	3	A	23.9	YES - unofficial			1989-12-13	0.5	Color code did not exist at eruption start	The Redoubt 1989-1990 eruption did not have three seismometers working for at least six months prior to eruption, as before October 1989, there were only two seismic stations. It is included as “seismically monitored” because even these limited stations were enough to detect precursory seismic activity that began in September, 1989. AVO’s first notifications (prior to developing the color code) w…	Miller, T. P. and Chouet, B. A., (eds.), The 1989-1990 eruptions of Redoubt Volcano, Alaska, Journal of Volcanology and Geothermal Research, v. 62, n. 1.
Redoubt	2009-03-15	2009-03-15	Good	3	A	19.3	YES			2008-11-05	130	G to Y	Redoubt erupted on March 15, 2009, after several months of unrest. The phreatic March 15 explosion was followed by a magmatic explosion on March 22. All told, there were 19 ash-producing explosions, with clouds reaching 18.9 km above sea level. At least two lava domes grew and were destroyed before the final lava dome extrusion between April 1 and July 1, 2009. This eruption caused significant im…	Schaefer, J.R., ed., 2012, The 2009 eruption of Redoubt Volcano, Alaska, with contributions by Bull, Katharine, Cameron, Cheryl, Coombs, Michelle, Diefenbach, Angie, Lopez, Taryn, McNutt, Steve, Neal, Christina, Payne, Allison, Power, John, Schneider, Dave, Scott, William, Snedigar, Seth, Thompson, Glenn, Wallace, Kristi, Waythomas, Chris, Webley, Peter, and Werner, Cynthia: Alaska Division of Ge…
Redoubt	2009-12-27		UwE		A	0.8	YES			2009-12-28		G to Y	AVO raised the Aviation Color Code and Volcano Alert Level to YELLOW/ADVISORY after a series of small, repetitive earthquakes began on December 27, 2009. The swarm decreased on December 29, 2009.	McGimsey, R.G., Neal, C.A., Girina, O.A., Chibisova, Marina, and Rybin, Alexander, 2014, 2009 Volcanic activity in Alaska, Kamchatka, and the Kurile Islands - summary of events and response of the Alaska Volcano Observatory: U.S. Geological Survey Scientific Investigations Report 2013-5213, 125 p., http://pubs.usgs.gov/sir/2013/5213/ .
Redoubt	2010-04-04		UwE		A	1	YES			2010-04-05		G to Y	AVO raised the Aviation Color Code and Volcano Alert Level to YELLOW/ADVISORY after an increase in seismicity occurred on April 4, 2010. Seismicity returned to normal levels by April 12, 2010.	Neal, C.A., Herrick, J., Girina, O.,A., Chibisova, M., Rybin, A., McGimsey, R.G., and Dixon, J., 2014, 2010 Volcanic activity in Alaska, Kamchatka, and the Kurile Islands - Summary of events and response of the Alaska Volcano Observatory: U.S. Geological Survey Scientific Investigations Report 2014-5034, 76 p., http://dx.doi.org/10.3133/sir20145034 .
Seguam	1992-12-27	1992-12-27	Detect Only	2	BA	15.8	NO	1		1992-12-28			U.S. Coast Guard pilots observed an ash cloud from Seguam, rising to 1,200 m.	McGimsey, R.G., Neal, C.A., and Doukas, M.P., 1995, Volcanic activity in Alaska: Summary of events and response of the Alaska Volcano Observatory 1992: U.S. Geological Survey Open-File Report 95-83, 26 p.
Seguam	1993-05-28	1993-05-28	Detect Only	2	BA	0.4	NO	7		1993-06-04			The U.S. Coast Guard observed a small ash burst on May 28, 1993. USCG observers also reported explosive ash eruptions up to 2,500 m above sea level from July 31 - August 19, 1993.	Miller, T.P., McGimsey, R.G., Richter, D.H., Riehle, J.R., Nye, C J., Yount, M.E., and Dumoulin, J.A., 1998, Catalog of the historically active volcanoes of Alaska: U.S. Geological Survey Open-File Report 98-0582, 104 p.
Semisopochnoi	2014-06-09	2014-06-09	UwE		BA	27.2	NO			2014-06-13			An earthquake swarm and uplift (measured by InSAR) occurred from June - August 2014, likely the result of a magma intrusion.	Cameron, C.E., Dixon, J.P., Neal, C.A., Waythomas, C.F., Schaefer, J.R., and McGimsey, R.G., 2017, 2014 Volcanic activity in Alaska - Summary of events and response of the Alaska Volcano Observatory: U.S. Geological Survey Scientific Investigations Report 2017-5077, 81 p., https://doi.org/10.3133/sir20175077.
Semisopochnoi	2015-01-01	2017-01-15	UwE		BA	27.7	YES - unofficial			2015-03-25		U to Y	AVO observed an earthquake swarm at Semisopochnoi, from January - April 2015.	Dixon, J.P., Cameron, C.E., Iezzi, A.M., and Wallace, Kristi, 2017, 2015 Volcanic activity in Alaska-Summary of events and response of the Alaska Volcano Observatory: U.S. Geological Survey Scientific Investigations Report 2017-5104, 61 p., https://doi.org/10.3133/sir20175104.
Shishaldin	1993-10-26	1993-10-26	Uncertain		B	7.6	NO			1993-10-29			Reports of steam clouds, possibly containing ash, from September 4 - October 29, 1993. Possible ash was observed on the flanks of Shishaldin on October 26.	Neal, C.A., McGimsey, R.G., and Doukas, M.P., 1996, 1993 volcanic activity in Alaska: summary of events and response of the Alaska Volcano Observatory: U.S. Geological Survey Open-File Report 96-0024, 21 p.
Shishaldin	1994-10-04	1994-10-04	Uncertain		B	8.6	NO						Pilot report of a steam plume with minor amounts of ash, on October 4, 1994.	Neal, C.A., Doukas, M.P., and McGimsey, R.G., 1995, 1994 volcanic activity in Alaska: summary of events and response of the Alaska Volcano Observatory: U.S. Geological Survey Open-File Report 95-0271, 18 p.
Shishaldin	1995-12-23	1995-12-23	Detect Only	3	B	9.8	NO	1		1995-12-24			Pilot report and satellite imagery of an ash cloud from Shishaldin to 10 km above sea level. Possible trace ashfall in Cold Bay, however low-level winds should have carried ash away from Cold Bay. The December 23 ash plume dissipated in satellite imagery by December 24, 1995.	Neal, Christina, and McGimsey, R.G., 1997, 1996 volcanic activity in Alaska and Kamchatka: Summary of events and response of the Alaska Volcano Observatory: U.S. Geological Survey Open-File Report 97-0433, 34 p.
Shishaldin	1996-05-16	1996-05-16	Uncertain		B	0.4	NO			1996-06-02			Fieldwork photos taken May 16, 1996, show possible fresh ash on the flanks and upper crater rim of Shishaldin.	Neal, Christina, and McGimsey, R.G., 1997, 1996 volcanic activity in Alaska and Kamchatka: Summary of events and response of the Alaska Volcano Observatory: U.S. Geological Survey Open-File Report 97-0433, 34 p.
Shishaldin	1997-06-02	1997-06-02	Detect Only	1	B	1.4	NO	0.375		1996-06-02			An observer in Cold Bay reported a steam and ash plume rising to 450 m above the summit.	McGimsey, R.G., and Wallace, K.L., 1999, 1997 volcanic activity in Alaska and Kamchatka: Summary of events and response of the Alaska Volcano Observatory: U.S. Geological Survey Open-File Report 99-0448, 42 p.
Shishaldin	1998-11-04	1998-11-04	Uncertain		B	1.4	YES						A U.S. Coast Guard observer noted a possible ash plume rising about 30 m above the summit.	McGimsey, R.G., Neal, C.A., and Girina, Olga, 2003, 1998 volcanic activity in Alaska and Kamchatka: Summary of events and response of the Alaska Volcano Observatory: U.S. Geological Survey Open-File Report 03-0423, 35 p.
Shishaldin	1999-04-17	1999-04-17	Good	3	B	1.9	YES			1999-02-18	58	G to Y	Precursory seismicity began in the summer of 1998; on February 18, 1999, AVO raised the Level of Concern Color Code from GREEN to YELLOW, based on the presence of anomalous seismicity, robust steam plumes, and thermal anomalies. Shishaldin erupted on April 19 and April 22-23, 1999, with ash clouds as high as 17 km above sea level, and vigorous lava fountaining. The April 19 ash cloud disrupted No…	Nye, C J., Keith, T.E.C., Eichelberger, J.C., Miller, T.P., McNutt, S.R., Moran, S., Schneider, D.J., Dehn, J., and Schaefer, J.R., 2002, The 1999 eruption of Shishaldin Volcano, Alaska: monitoring a distant eruption: Bulletin of Volcanology, v. 64, n. 8, p. 507-519.
Shishaldin	1999-09-25	1999-09-25	Uncertain		B	0.4	YES			2000-02-03		G to Y	Small explosion signals detected in seismic data between September, 1999 and February, 2000; possibly the result of small phreatic explosions within the cone's central crater.	Neal, C.A., McGimsey, R.G., and Chubarova, Olga, 2004: 2000 Volcanic activity in Alaska and Kamchatka: Summary of events and response of the Alaska Volcano Observatory: U.S. Geological Survey Open-File Report 2004-1034, 37 p.
Shishaldin	2000-08-11	2000-08-11	Uncertain		B	1.5	YES						Small explosion signals detected in seismic data on August 11, 2000, coincident with a weak thermal anomaly.	Neal, C.A., McGimsey, R.G., and Chubarova, Olga, 2004: 2000 Volcanic activity in Alaska and Kamchatka: Summary of events and response of the Alaska Volcano Observatory: U.S. Geological Survey Open-File Report 2004-1034, 37 p.
Shishaldin	2004-02-17	2004-02-17	Detect Only	2	B	5	YES	76	76	2004-05-03		G to Y	A pilot reported a hazy ash layer above Shishaldin on Feburary 17, 2004. Cold Bay observers also reported steam and ash plumes on Feburary 26. AVO raised the Level of Concern Color Code to YELLOW on May 3, in response to increasing seismic tremor and thermal anomalies. A steam plume, possibly containing ash, was reported on May 16 by a pilot and observed in satellite imagery. Elevated seismicity …	Neal, C.A., McGimsey, R.G., Dixon, Jim, and Melnikov, Dimitry, 2005, 2004 volcanic activity in Alaska and Kamchatka: summary of events and response of the Alaska Volcano Observatory: U.S. Geological Survey Open-File Report 2005-1308, 71 p., http://pubs.usgs.gov/of/2005/1308/.
Shishaldin	2008-01-08	2008-01-08	Uncertain		B	3.9	YES						Pilots reported steam and possible ash plumes at Shishaldin in early January through early February, 2008.	Neal, C.A., McGimsey, R.G., Dixon, J.P., Cameron, C.E., Nuzhaev, A.A., and Chibisova, Marina, 2011, 2008 Volcanic activity in Alaska, Kamchatka, and the Kurile Islands: Summary of events and response of the Alaska Volcano Observatory: U.S. Geological Survey Scientific Investigations Report 2010-5243, 94 p., available at http://pubs.usgs.gov/sir/2010/5243 .
Shishaldin	2008-06-03	2008-06-03	Uncertain		B	4.3	NO						Pilots and mariners reported steam and possible ash plumes at Shishaldin in June, July, and August 2008.	Neal, C.A., McGimsey, R.G., Dixon, J.P., Cameron, C.E., Nuzhaev, A.A., and Chibisova, Marina, 2011, 2008 Volcanic activity in Alaska, Kamchatka, and the Kurile Islands: Summary of events and response of the Alaska Volcano Observatory: U.S. Geological Survey Scientific Investigations Report 2010-5243, 94 p., available at http://pubs.usgs.gov/sir/2010/5243 .
Shishaldin	2009-01-05	2009-01-05	Uncertain		B	4.9	YES			2009-01-06		G to Y	Elevated seismicity, thermal anomalies, and observer reports of robust steam and possible ash plumes at Shishaldin from early January 2009 through August 2009.	McGimsey, R.G., Neal, C.A., Girina, O.A., Chibisova, Marina, and Rybin, Alexander, 2014, 2009 Volcanic activity in Alaska, Kamchatka, and the Kurile Islands - summary of events and response of the Alaska Volcano Observatory: U.S. Geological Survey Scientific Investigations Report 2013-5213, 125 p., http://pubs.usgs.gov/sir/2013/5213/ .
Shishaldin	2014-02-07	2014-02-07	Good	1	B	10	NO			2014-01-30	8		The eruption consisted of intermittent steam plumes, sometimes containing small amounts of ash, intermittent lava within the crater, and occasional ashfall on the upper flanks of the volcano.	Cameron, C.E., Dixon, J.P., Neal, C.A., Waythomas, C.F., Schaefer, J.R., and McGimsey, R.G., 2017, 2014 Volcanic activity in Alaska - Summary of events and response of the Alaska Volcano Observatory: U.S. Geological Survey Scientific Investigations Report 2017-5077, 81 p., https://doi.org/10.3133/sir20175077.
Shishaldin	00-Nov-2017	2017-11-15	UwE		B	3.8	YES			2017-12-06		G to Y	On December 6, 2017, citing increased seismic and infrasound activity at Shishaldin over the past few weeks, AVO raised the Aviation Color Code and Volcanic Alert Level from GREEN/NORMAL to YELLOW/ADVISORY. At the time of this table creation in December, 2017, Shishaldin remains YELLOW and has not erupted.	https://www.avo.alaska.edu/volcanoes/activity.php?volcname=Shishaldin&page=basic&eruptionid=4331
Spurr	1992-06-27	1992-06-27	Good	4	BA	39	YES			1992-06-08	19	G to Y	After 10 months of increasing seismicity, Spurr had three explosive eruptions in 1992: June 27, August 18, and Septebmer 16-17. AVO's first alert to the public was June 8. Ash clouds from these explosions reached 14.5 km above sea level, caused signficant disruption to North Pacific air travel, and created ashfall on the upper Kenai Peninsula and Anchorage.	Eichelberger, J.C., Keith, T.E.C., Miller, T.P., and Nye, C.J., 1995, The 1992 eruptions of Crater Peak Vent, Mount Spurr volcano, Alaska: chronology and summary: in Keith, T. E. C., (ed.), The 1992 eruptions of Crater Peak Vent, Mount Spurr volcano, Alaska, U.S. Geological Survey Bulletin 2139, p. 1-18.
Spurr	1992-10-02	1992-10-02	False Alarm		BA	0.3	YES			1992-10-02		Y to R	In the aftermath of the 1992 eruption of Mt. Spurr, seismic tremor increased at Spurr on October 2, 1992. AVO raised the color code to RED and stated that a large eruption was likely in 24-48 hours. Tremor subsided and no eruption ensued. A similar scenario occurred on November 9, when AVO raised the color code to ORANGE, and then to RED with increasing seismicity, again stating that a large erup…	https://www.avo.alaska.edu/activity/report.php?type=4&id=1015&mode=archive https://www.avo.alaska.edu/activity/report.php?type=4&id=1046&mode=archive
Spurr	00-Jul-2004	2004-07-15	UwE		A	12	YES			2004-07-26		G to Y	Mt. Spurr recorded volcanic unrest between July 2004 and February 2006, including increase in heat flow (melting of the crater lake), seismicity, and degassing, likely the result of a magmatic intrusion in mid-2004.	Coombs, M.L., Neal, C.A., Wessels, R.L., and McGimsey, R.G., 2006, Geothermal disruption of summit glaciers at Mount Spurr Volcano, 2004-6: an unusual manifestation of volcanic unrest: U.S. Geological Survey Professional Paper 1732-B, 33 p., available at http://pubs.usgs.gov/pp/pp1732/pp1732b/index.html .
Takawangha	2017-01-23	2017-01-23	UwE		BA	??	YES - unofficial			2017-01-24		U to Y	An energetic earthquake swarm at Takawangha began on January 23, 2017. AVO raised the Aviation Color Code and Volcano Alert Level from UNASSIGNED to YELLOW/ADVISORY on January 24, and, following a decline in seismicity, lowered it on February 8, 2017.	https://www.avo.alaska.edu/volcanoes/activity.php?volcname=Takawangha&eruptionid=1711&page=basic
Tanaga	2005-10-01	2005-10-01	UwE		BA	91.4	YES			2005-10-05		G to Y on 7 Oct 2005; info statement on 5 Oct 2005	Seismicity increased at Tanaga on October 1, 2005, and after about a week, slowly declined. AVO raised Tanaga to YELLOW from October 5, 2005 through November 25, 2005.	McGimsey, R.G., Neal, C.A., Dixon, J.P., and Ushakov, Sergey, 2008, 2005 Volcanic activity in Alaska, Kamchatka, and the Kurile Islands: Summary of events and response of the Alaska Volcano Observatory: U.S. Geological Survey Scientific Investigations Report 2007-5269, 94 p., available at http://pubs.usgs.gov/sir/2007/5269/ .
Veniaminof	1993-07-30	1993-07-30	Detect Only	2	BA	8.7	NO	1		1993-07-31			The 1993 eruption of Veniaminof lasted about a year, and consisted of intermittent steam and ash emissions rising as high as 5,500 m above sea level, and construction of small lava flow within the summit crater.	Neal, C.A., Doukas, M.P., and McGimsey, R.G., 1995, 1994 volcanic activity in Alaska: summary of events and response of the Alaska Volcano Observatory: U.S. Geological Survey Open-File Report 95-0271, 18 p.
Veniaminof	1995-04-17	1995-04-17	Detect Only	1	BA	1.7	NO	0.75		1995-04-21			Low-level, intermittent steam and ash plumes were observed at Veniaminof between April 1995 and November 1996.	McGimsey, R.G., and Neal, Christina, 1996, 1995 volcanic activity in Alaska and Kamchatka: summary of events and response of the Alaska Volcano Observatory: U.S. Geological Survey Open-File Report 96-0738, 22 p.
Veniaminof	2002-09-24	2002-09-28	Good	1	BA	7.5	YES			2002-09-11	13	U* to Y (added to formally monitored list at Yellow)	Noting increased seismicity, AVO raised the Level of Concern Color Code to YELLOW on September 11, 2002. Small steam plumes possibly containing ash were observed by residents of Perryville, but the eruption definetly began by October 28, 2002, when video taken from Sandy River showed small, dilute, gray-brown clouds rising from Veniaminof. Intermittent steam and ash plumes continued at Veniaminof…	Neal, C.A., McGimsey, R.G., and Girina, Olga, 2005, 2002 Volcanic activity in Alaska and Kamchatka: Summary of events and response of the Alaska Volcano Observatory: U.S. Geological Survey Open-File Report 2004-1058, 55 p., available online at http://pubs.usgs.gov/of/2004/1058/.
Veniaminof	2004-02-16	2004-02-19	Detect Only	2	BA	1.4	YES	7	7	2004-02-23		Info statement on 23 Feb 2004; G to Y on April 19, 2004	Residents of Perryville observed small ash plumes at Veniaminof in mid February, 2004. On February 19, a pilot reported a small, black ash cloud rising 90 m above the caldera. This eruption continued with intermittent, small steam and ash plumes through September 2004.	Neal, C.A., McGimsey, R.G., Dixon, Jim, and Melnikov, Dimitry, 2005, 2004 volcanic activity in Alaska and Kamchatka: summary of events and response of the Alaska Volcano Observatory: U.S. Geological Survey Open-File Report 2005-1308, 71 p., http://pubs.usgs.gov/of/2005/1308/.
Veniaminof	2005-01-04	2005-01-04	Detect Only	2	BA	0.9	YES	0.25	0.25	2005-01-04		G to Y	Elevated seismicity perhaps began as early as January 1, 2005. On January 4, AVO noted continuous tremor, a thermal anomaly seen in satellite imagery, and received a pilot report of small bursts of ash rising a few hundred meters. Low-level intermitted steam and ash plumes (the highest reaching about 4 km above sea level) continued through February 2005.	McGimsey, R.G., Neal, C.A., Dixon, J.P., and Ushakov, Sergey, 2008, 2005 Volcanic activity in Alaska, Kamchatka, and the Kurile Islands: Summary of events and response of the Alaska Volcano Observatory: U.S. Geological Survey Scientific Investigations Report 2007-5269, 94 p., available at http://pubs.usgs.gov/sir/2007/5269/ .
Veniaminof	2005-09-07	2005-09-07	Detect Only	1	BA	0.7	YES	0.125	0.125	2005-09-07		G to Y	Minor bursts of ash and increased seismicity heralded the beginning of eruptive actiivty in September 2005. Low-level, intermittent ash clouds (the highest rising about 3 km) continued until early November 2005.	McGimsey, R.G., Neal, C.A., Dixon, J.P., and Ushakov, Sergey, 2008, 2005 Volcanic activity in Alaska, Kamchatka, and the Kurile Islands: Summary of events and response of the Alaska Volcano Observatory: U.S. Geological Survey Scientific Investigations Report 2007-5269, 94 p., available at http://pubs.usgs.gov/sir/2007/5269/ .
Veniaminof	2006-03-03	2006-03-03	Detect Only	1	BA	0.5	YES	0.25	0.25	2006-03-03		G to Y	Activity similar to that recorded in 2004 and 2005 began again in March, 2006. Intermittent, small steam and ash plumes occurred thoughout most of 2006.	Neal, C.A., McGimsey, R.G., Dixon, J.P., Manevich, Alexander, and Rybin, Alexander, 2009, 2006 Volcanic activity in Alaska, Kamchatka, and the Kurile Islands: Summary of events and response of the Alaska Volcano Observatory: U.S. Geological Survey Scientific Investigations Report 2008-5214, 102 p., available at http://pubs.usgs.gov/sir/2008/5214/ .
Veniaminof	2008-02-22	2008-02-22	Detect Only	1	BA	2.5	YES	0.25	0.25	2008-02-22		G to Y	Several minor bursts of ash from Veniaminof's active cone were observed on February 22, 2008. Seismicity was also elevated. A pilot reported ash to 3 km on February 29.	Neal, C.A., McGimsey, R.G., Dixon, J.P., Cameron, C.E., Nuzhaev, A.A., and Chibisova, Marina, 2011, 2008 Volcanic activity in Alaska, Kamchatka, and the Kurile Islands: Summary of events and response of the Alaska Volcano Observatory: U.S. Geological Survey Scientific Investigations Report 2010-5243, 94 p., available at http://pubs.usgs.gov/sir/2010/5243 .
Veniaminof	2009-01-08	2009-01-08	Uncertain		BA	0.9	YES			2009-05-07		G to Y	Intermittent steam and minor ash plumes, with elevated seismicity, occurred from January 2008 through October 2009. In 2009, AVO's seismic network at Veniaminof began deteriorating, and AVO removed it from the list of monitored voclanoes on November 17, 2009.	McGimsey, R.G., Neal, C.A., Girina, O.A., Chibisova, Marina, and Rybin, Alexander, 2014, 2009 Volcanic activity in Alaska, Kamchatka, and the Kurile Islands - summary of events and response of the Alaska Volcano Observatory: U.S. Geological Survey Scientific Investigations Report 2013-5213, 125 p., http://pubs.usgs.gov/sir/2013/5213/ .
Veniaminof	2013-06-13	2013-06-13	Good	3	BA	4.4	YES			2013-06-08	5	G to Y	Seismicity increased at Veniaminof in early June, 2013, and AVO increased the Aviation Color Code and Volcano Alert Level to YELLOW/ADIVSORY on June 8. The eruption likely began on June 13, with the advent of elevated surface temperatures and increasing seismicity. Between June and October, 2013, the eruption was characterized by intermittent steam and ash plumes to 6 km above sea level and growt…	Dixon, J.P., Cameron, Cheryl, McGimsey, R.G., Neal, C.A., and Waythomas, Chris, 2015, 2013 Volcanic activity in Alaska - Summary of events and response of the Alaska Volcano Observatory: U.S. Geological Survey Scientific Investigations Report 2015-5110, 92 p., http://dx.doi.org/10.3133/sir20155110.
Veniaminof	2015-10-01	2015-10-01	UwE		BA	2.3	YES			2015-10-01		G to Y	Seismicity increased at Veniaminof in October, 2015, with tremor and low-frequency earthquakes. AVO raised the Aviation Color Code and Volcanic Alert Level to YELLOW/ADVISORY on October 1, citing that this activity was a known precursor to previous eruptions at Veniaminof. However, the seismicity declined without eruption, and AVO lowered the alerts on December 11, 2015.	Dixon, J.P., Cameron, C.E., Iezzi, A.M., and Wallace, Kristi, 2017, 2015 Volcanic activity in Alaska-Summary of events and response of the Alaska Volcano Observatory: U.S. Geological Survey Scientific Investigations Report 2017-5104, 61 p., https://doi.org/10.3133/sir20175104.
Westdahl	1991-11-29	1991-11-29	Detect Only	3	BA	13.9	NO	1		1991-11-29			The 1991 eruption of Westdahl lasted until mid-January 1992, and included intermittent steam and ash plumes to 7 km above sea level, and the creation of an 8-km-long fissure, feeding a 7-km lava flow. This eruption also produced trace ashfall on False Pass.	McGimsey, R.G., Neal, C.A., and Doukas, M.P., 1995, Volcanic activity in Alaska: Summary of events and response of the Alaska Volcano Observatory 1992: U.S. Geological Survey Open-File Report 95-83, 26 p.
